# Supplementary material
Source: publisher figshare collection journal article supplement (https://tandf.figshare.com/articles/dataset/_/8859584)
Supplement: Supplementary file 2 [file 1]

# Topsoil map of phytoavailable Phosphorus (P<sub>2</sub>O<sub>5</sub>) in South Tyrol, (northern Italy)

Scale 1:100,000

1 cm = 1000 m if printed in A0

Administrative Provinces  
BZ - Autonomous Province of Bolzano/Bozen  
TN - Autonomous Province of Trento

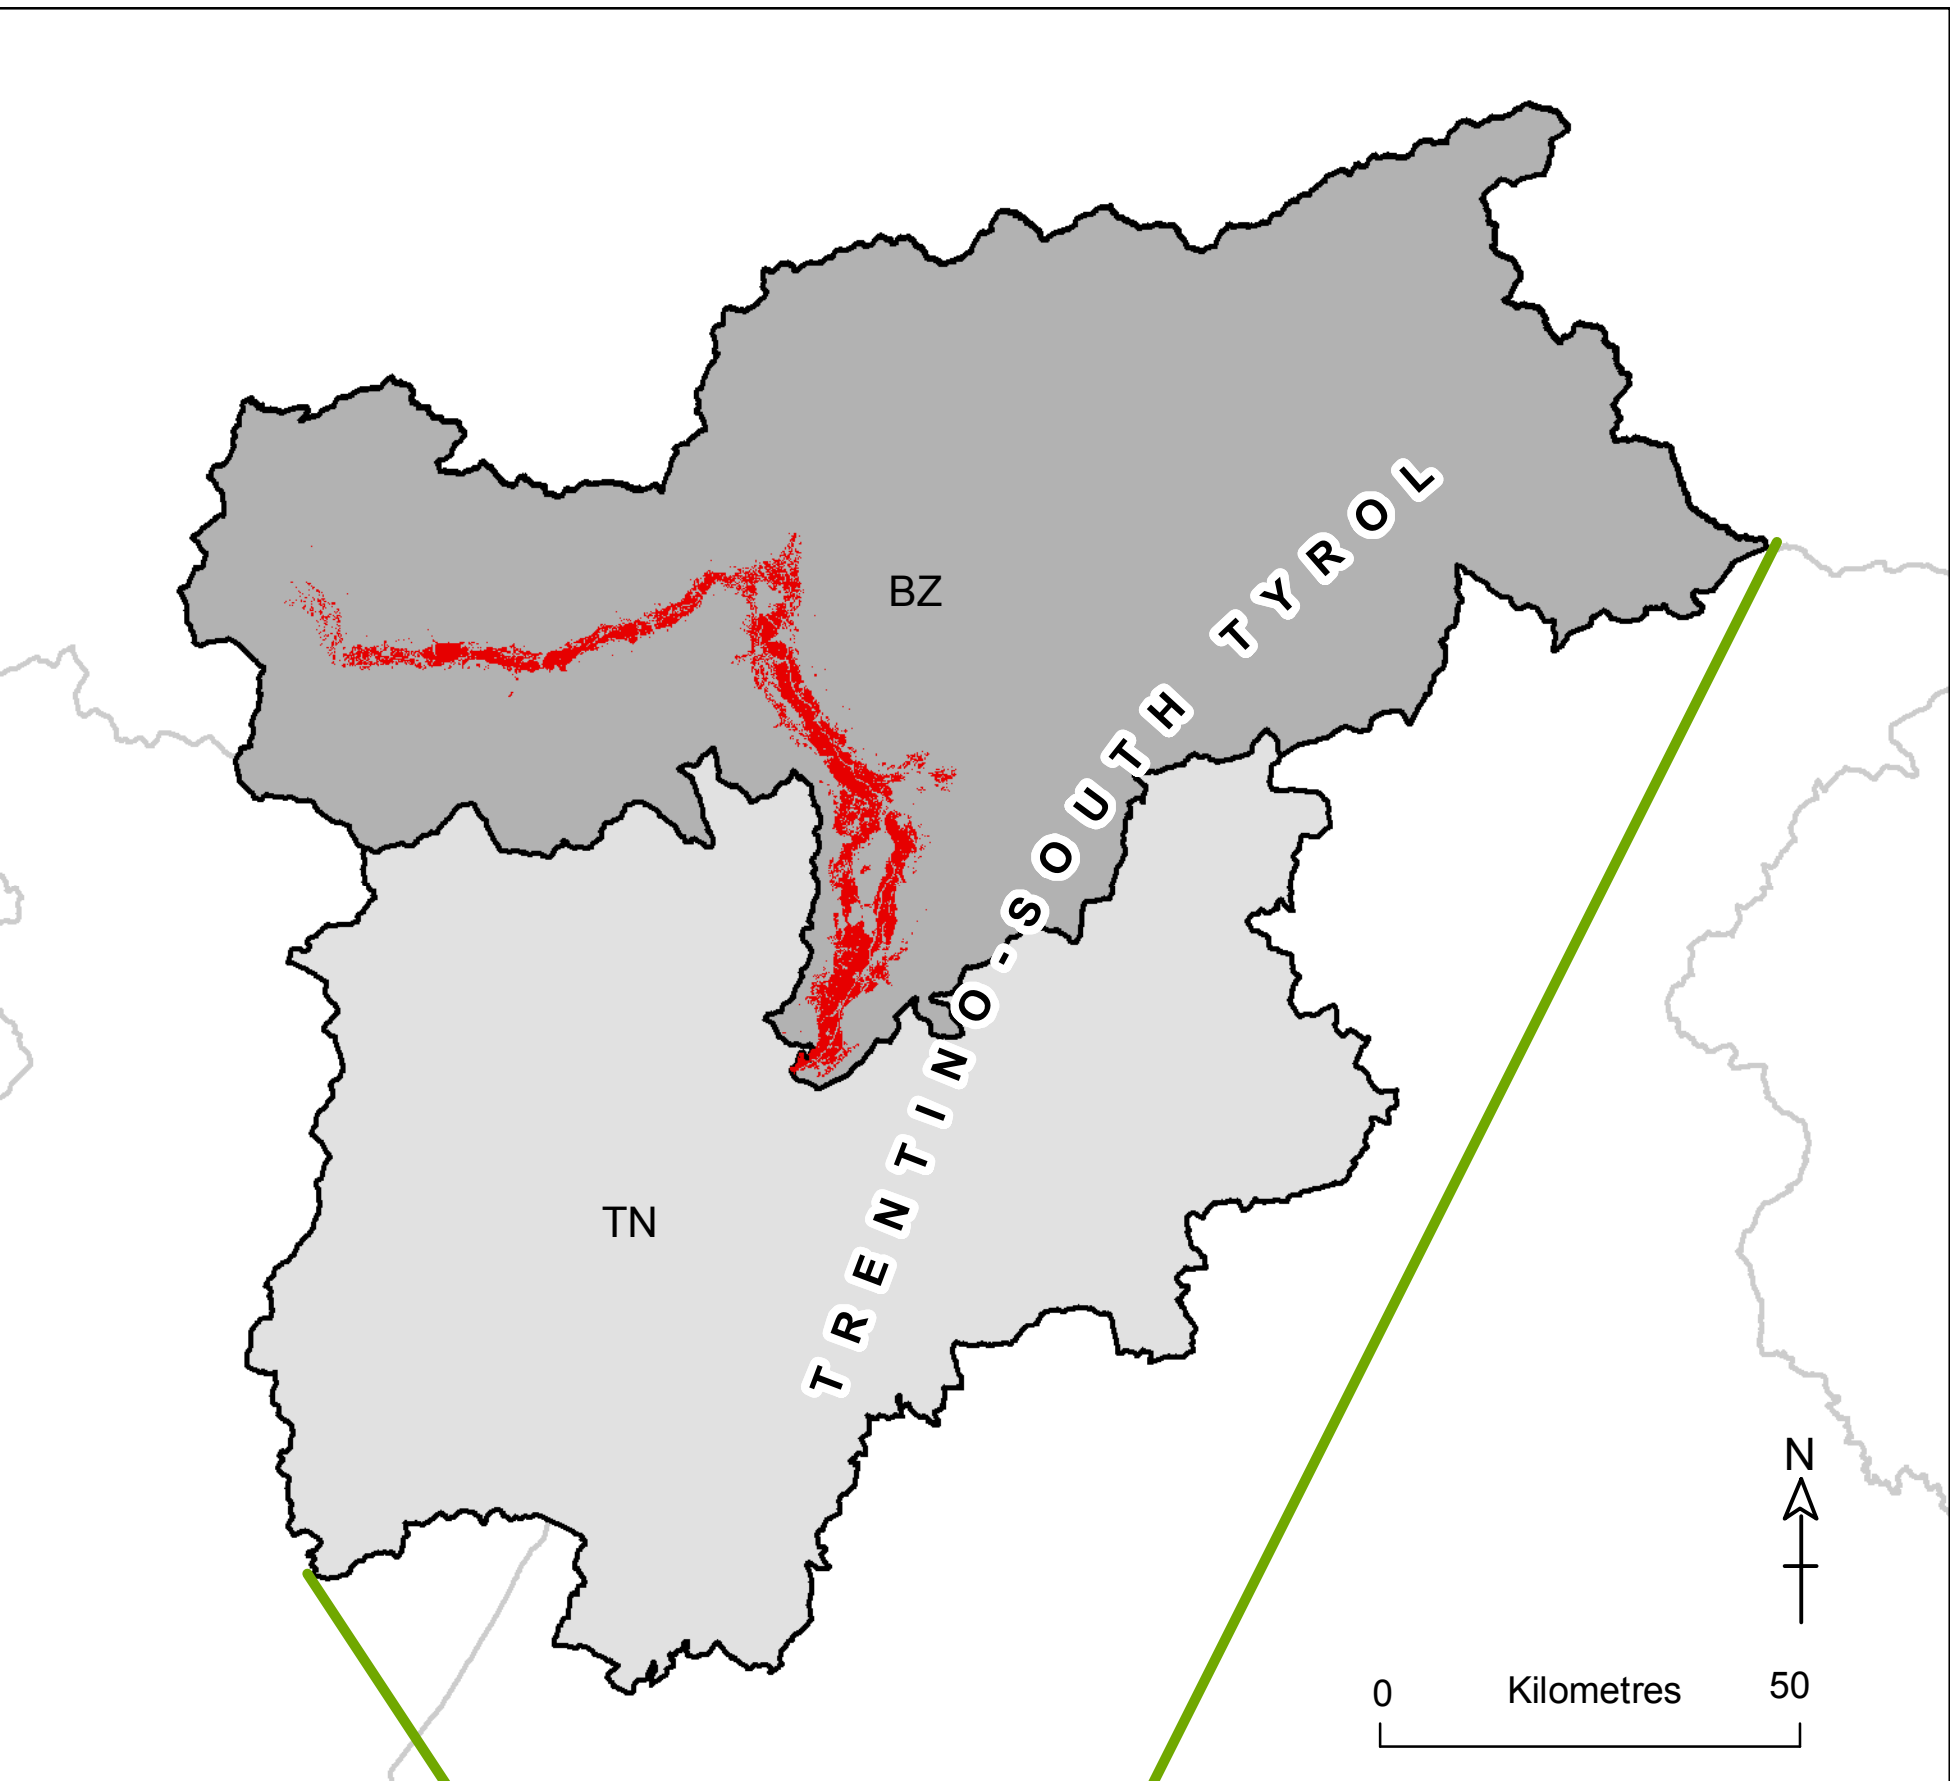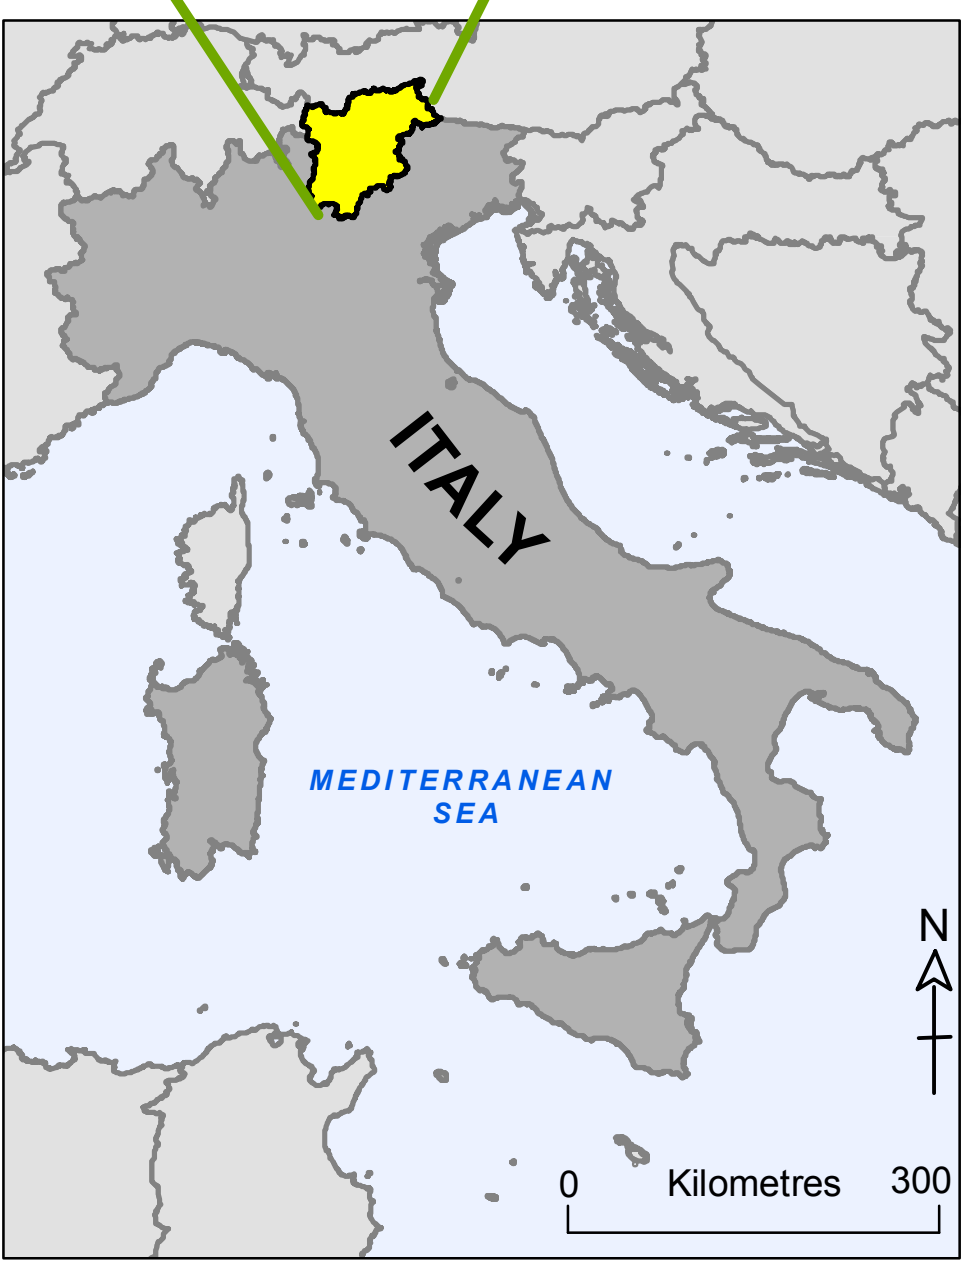

Coordinate system: WGS 84 UTM Zone 32N  
Software: ArcGIS® 10.4 for Desktop (by ESRI)  
was used during all of the stages of map production.

Stefano DELLA CHIESA<sup>1</sup>, Giulio GENOVA<sup>1,2</sup>,  
Daniele LA CECILIA<sup>3</sup>, Georg NIEDRIST<sup>1</sup>

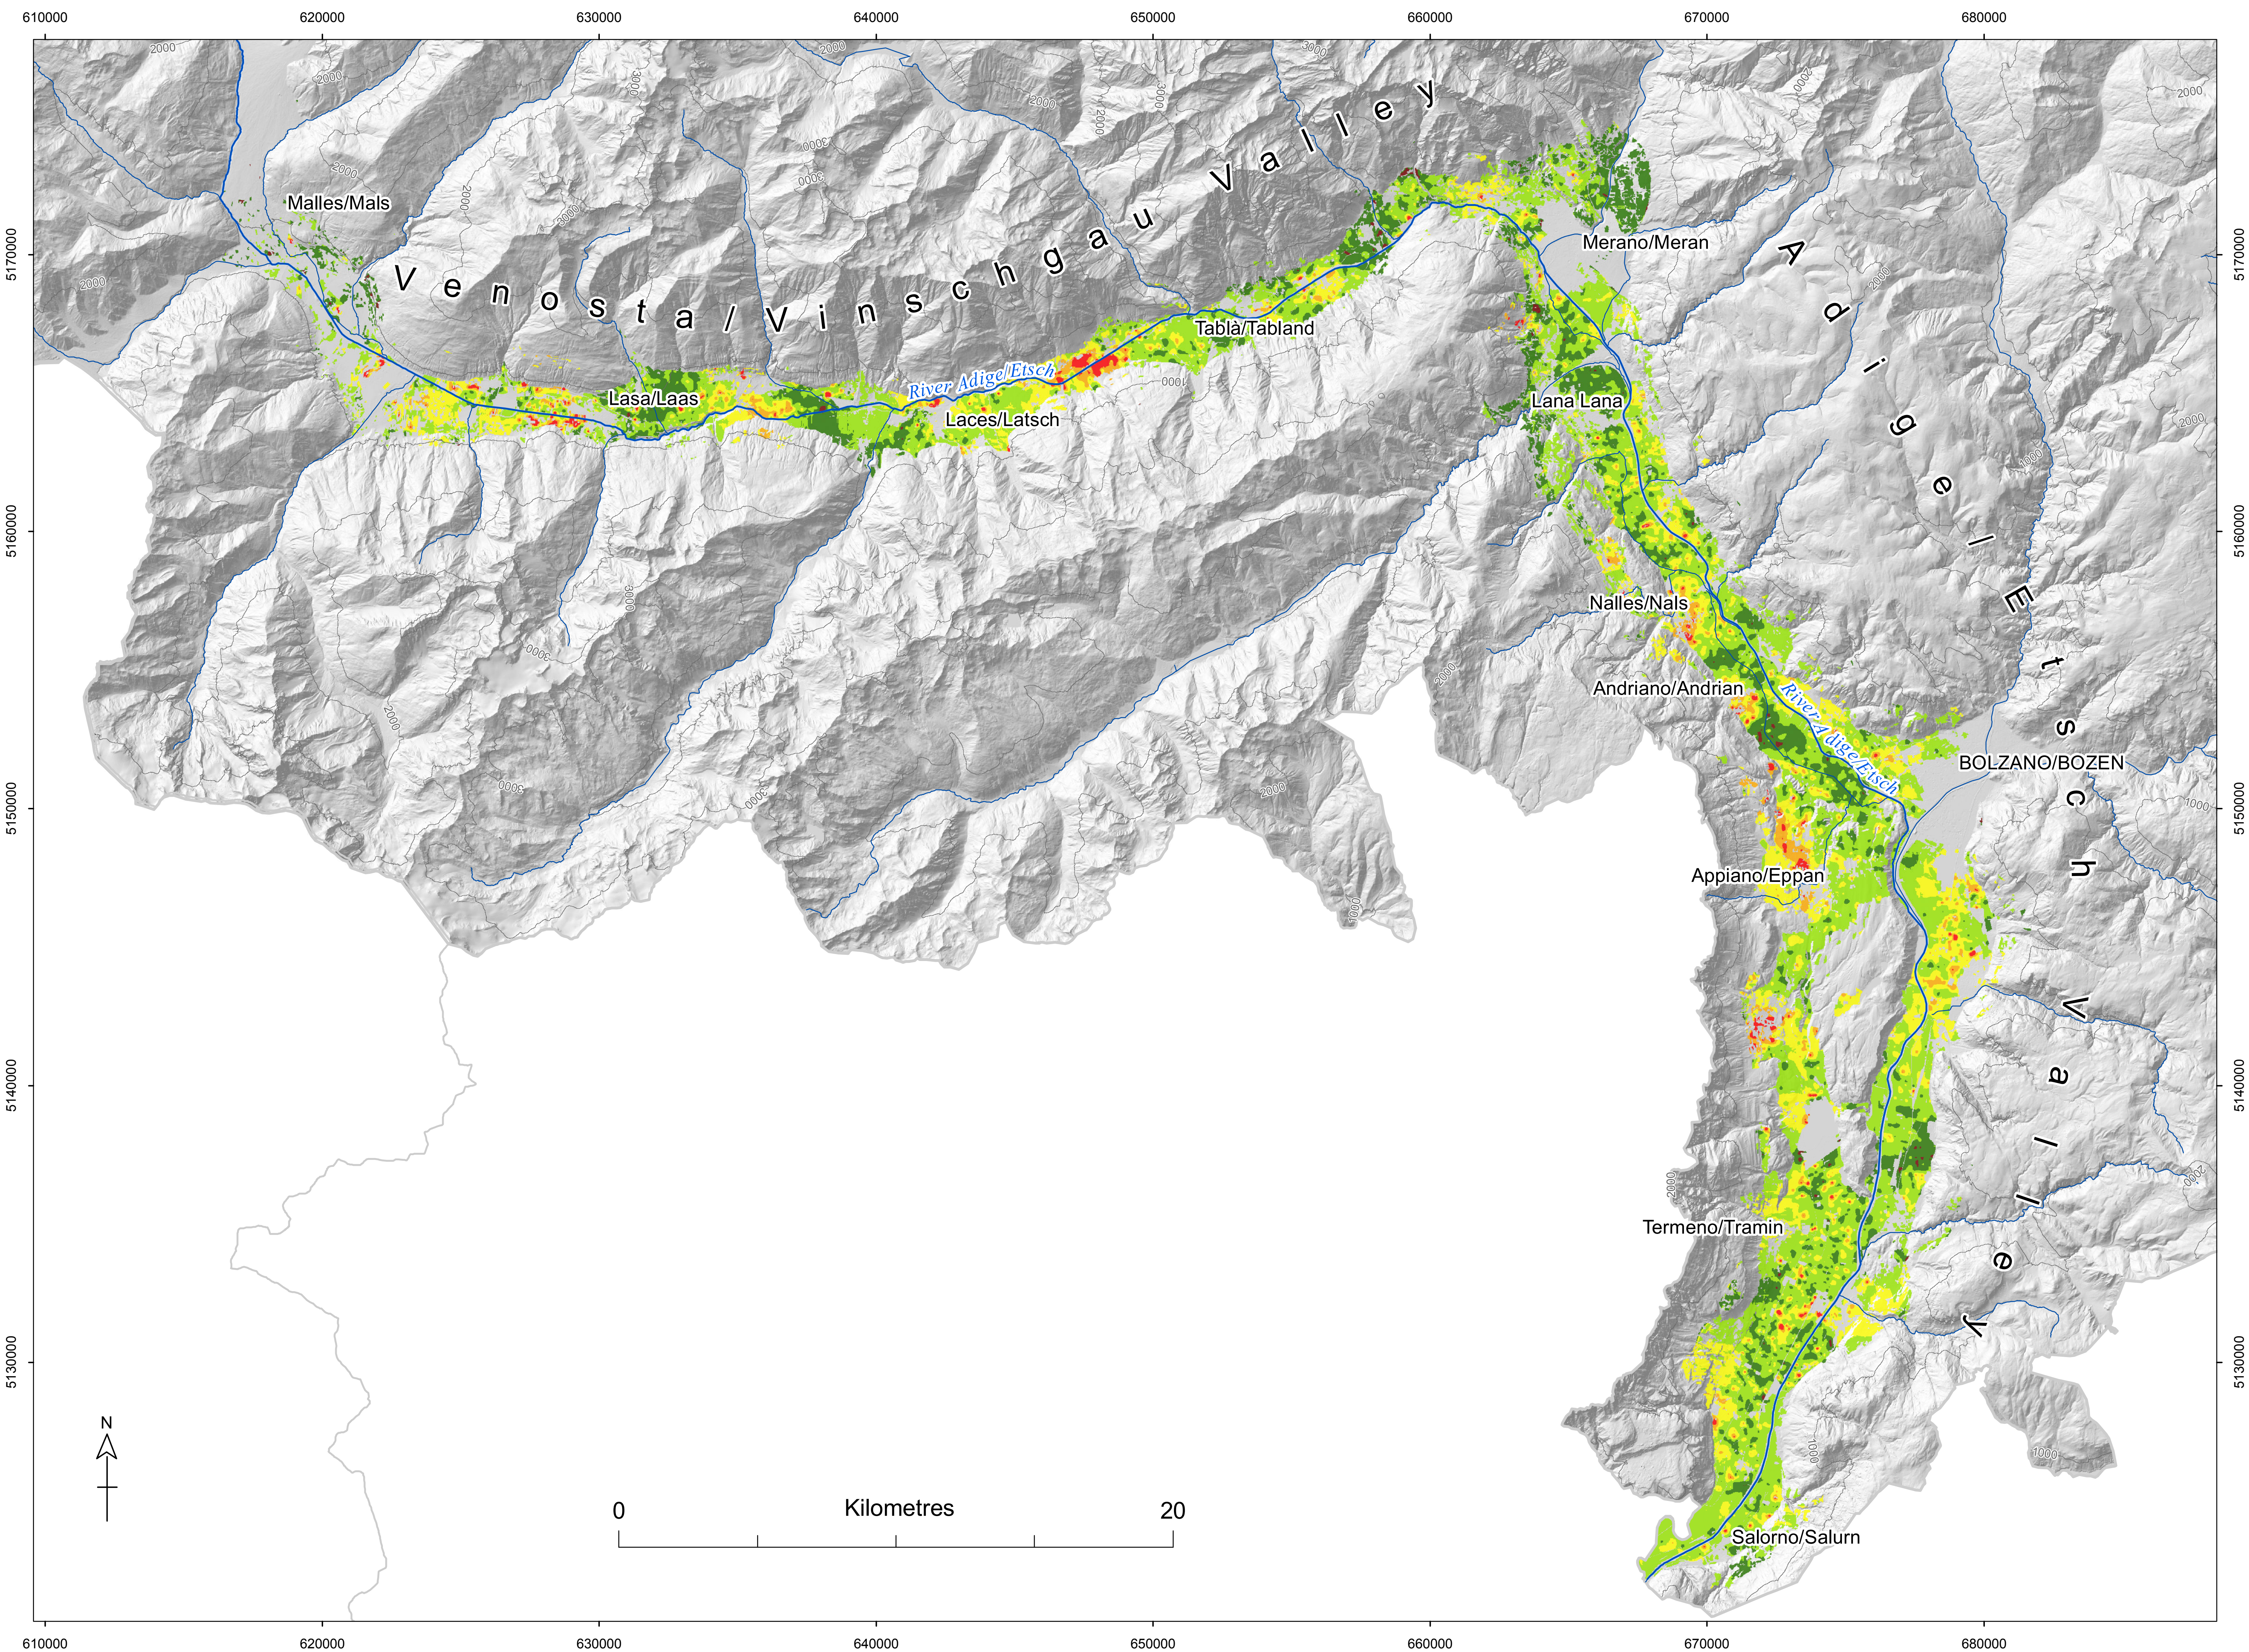

Spatial interpolation was conducted on apple orchards and vineyard fields. The other land use were masked. Phytoavailable P<sub>2</sub>O<sub>5</sub> soil concentrations estimated using the calcium-acetate-lactate (CAL) extraction method according to the Association of German Agricultural Analytic and Research Institutes (VDLUFA, 1991). Reference: VDLUFA, 1991. Methodenbuch, Band I: Die Untersuchung der Böden.

Concentration of phytoavailable Phosphorus(P<sub>2</sub>O<sub>5</sub>) [mg/kg]

< 100 100 - 200 200.01 - 300 300.01 - 400 400.01 - 500 > 500

eurac  
research

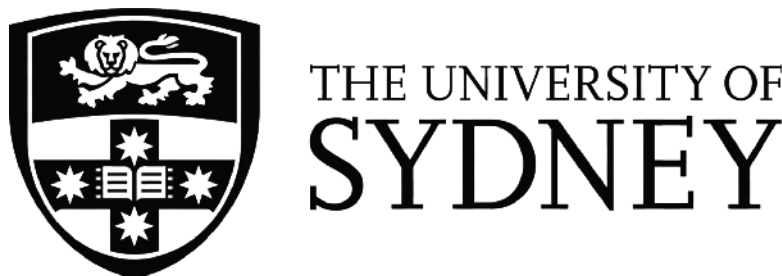

<sup>1</sup> eurac research, Institute for Alpine Environment, Bolzano/Bozen, Italy.  
<sup>2</sup> Faculty of Science and Technology, Free University of Bolzano/Bozen, Italy.  
<sup>3</sup> School of Civil Engineering, University of Sydney, Sydney 2006 NSW, Australia
